# Supplementary material
Source: PubMed Central journal article supplement (PMC7233293)
Supplement: NIHMS1545645-supplement-1.pdf [file NIHMS1545645-supplement-1.pdf]

## **Evaluation of Two Methods to Isolate Schwann Cells from Murine Sciatic Nerve.**

Joy E. Tomlinson <sup>at</sup>, Masoud Golshadi <sup>at</sup>, Christopher J. Donahue <sup>a</sup>, Lynn Dong <sup>a</sup>, Jonathan Cheetham <sup>a\*</sup>

<sup>a</sup> Cornell University College of Veterinary Medicine, Department of Clinical Sciences

930 Campus Road, Ithaca, NY 14853

<sup>†</sup> Equal Contributors

\* Corresponding author: Cornell University College of Veterinary Medicine, Department of Clinical Sciences

Email Address: [jc485@cornell.edu](mailto:jc485@cornell.edu)

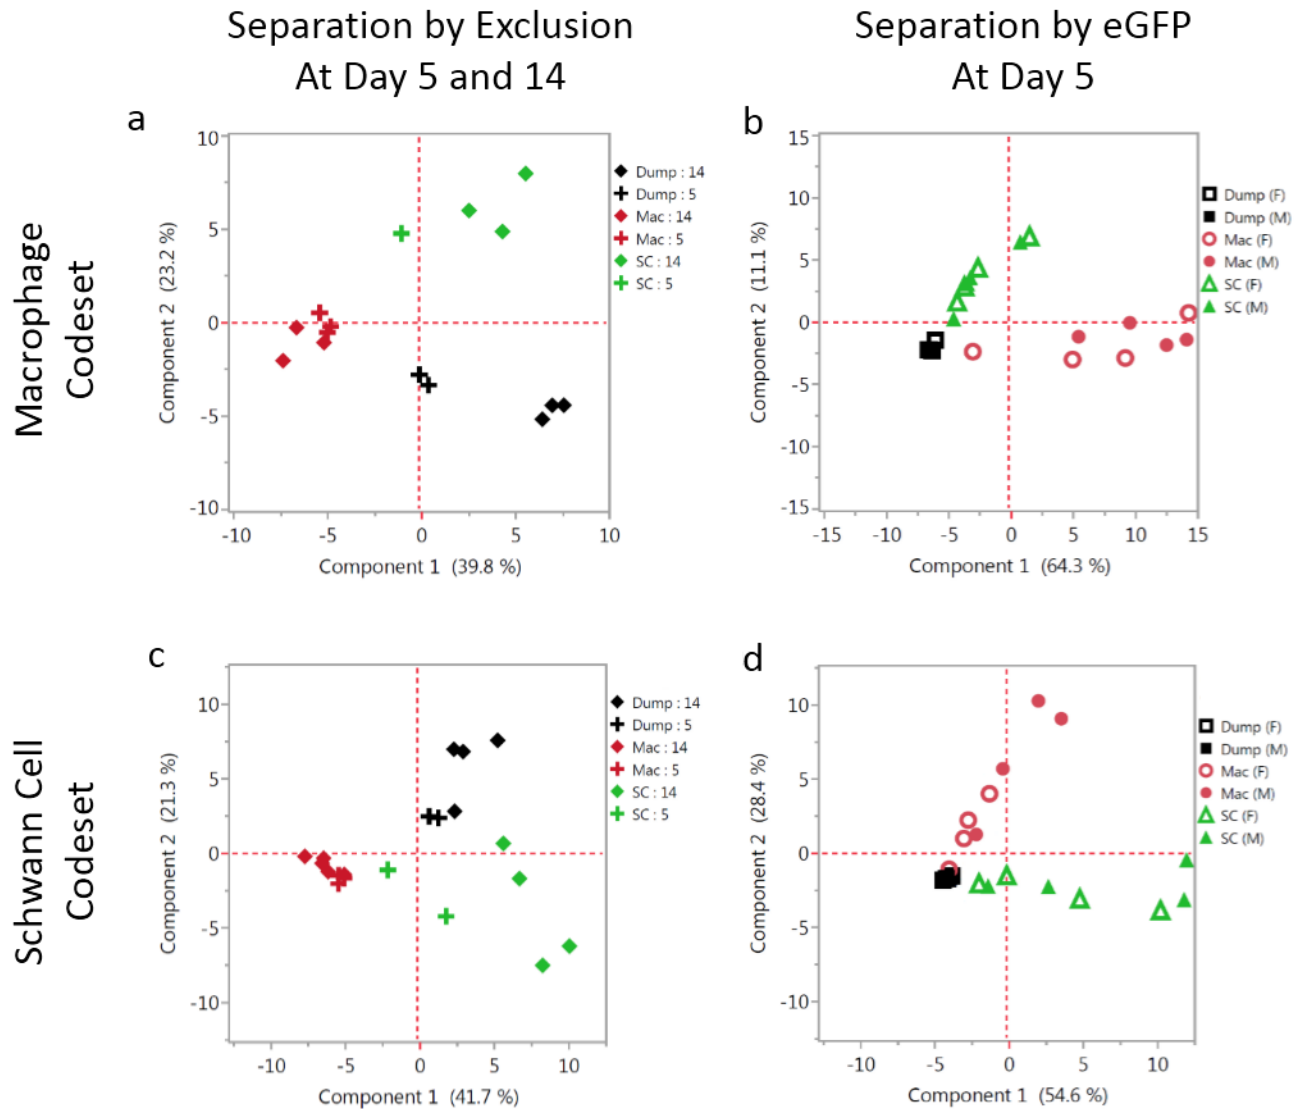

**Figure S1 – Gene expression of sorted cells clusters by population more than by time:**

Principal component analysis of gene expression among 3 groups of cells sorted from murine sciatic nerve either 5 or 14 days after injury (black: dump channel cells; red: macrophages; green: Schwann cells). The dump channel included eosinophils (Siglec-F+), lymphocytes (CD3e+, CD19+), neutrophils (Ly6G+), endothelial cells (CD31+), and fibroblasts (Thy-1.2+). Macrophages were F4/80+CD14+CD11b+CD16/32+ using wild type mice (a) and S100-eGFP mice (b). Presumptive Schwann cells were sorted by excluding cells positive for all of the above markers (c), or using GFP positive (d). Results indicate clustering more by population and less by the harvest timepoint (a, c). The distinct clustering of each cell type in both macrophage (b) and SC (d) codesets supports the effectiveness of the cell separation method using eGFP signal in S100-eGFP mice.

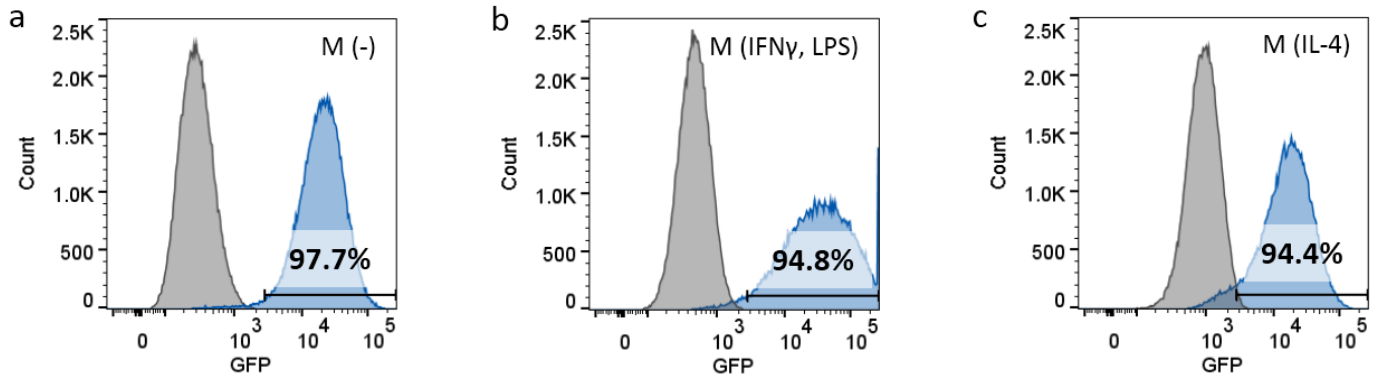

**Figure S2 – Bone marrow derived macrophages from S100-eGFP transgenic mice express GFP:**

Bone marrow derived macrophages were cultured under 3 stimulation conditions: no stimulation (a), IFN $\gamma$  and LPS (b), or IL4 (c). Anti-F4/80 label was used to confirm differentiation into macrophages. F4/80+ cells were analyzed for GFP expression by flow cytometry. Expression of GFP in macrophages is irrespective of macrophage phenotype. Data are representative of two independent experiments (n=2-3 mice/group).

**Table S1: List of genes in nanoString Codesets**

| CodeSet            | Gene Name | HUGO Gene | CodeSet              | Gene Name | HUGO Gene |
|--------------------|-----------|-----------|----------------------|-----------|-----------|
| Macrophage CodeSet | Actb      | Actb      | Schwann Cell CodeSet | F4/80     | Adgre1    |
|                    | F4/80     | Adgre1    |                      | Ankrd27   | Ankrd27   |
|                    | Alox15    | Alox15    |                      | Anxa1     | Anxa1     |
|                    | Ankrd27   | Ankrd27   |                      | BDNF      | Bdnf      |
|                    | Areg      | Areg      |                      | Bmp1      | Bmp1      |
|                    | Arg1      | Arg1      |                      | Bmp2      | Bmp2      |
|                    | Birc5     | Birc5     |                      | Bmp4      | Bmp4      |
|                    | Card11    | Card11    |                      | Bmp6      | Bmp6      |
|                    | Ccl11     | Ccl11     |                      | Bmp7      | Bmp7      |
|                    | Ccl17     | Ccl17     |                      | ccl2      | Ccl2      |
|                    | Ccl2      | Ccl2      |                      | ccl3      | Ccl3      |
|                    | Ccl22     | Ccl22     |                      | Cd14      | Cd14      |
|                    | Ccl24     | Ccl24     |                      | Cd19      | Cd19      |
|                    | Ccl5      | Ccl5      |                      | Cd3e      | Cd3e      |
|                    | Ccl7      | Ccl7      |                      | Cdh2      | Cdh2      |
|                    | Ccr2      | Ccr2      |                      | Cdc2      | Cdk1      |
|                    | Cd14      | Cd14      |                      | Cdk2      | Cdk2      |
|                    | Cd19      | Cd19      |                      | Cdkn1b    | Cdkn1b    |
|                    | Cd300e    | Cd300e    |                      | p16ink4a  | Cdkn2a    |
|                    | Cd3e      | Cd3e      |                      | Clu       | Clu       |
|                    | Cd5l      | Cd5l      |                      | CNTF      | Cntf      |
|                    | Chi3l3    | Chi3l3    |                      | dcc       | Dcc       |
|                    | Chi3l1    | Chil1     |                      | DHH       | Dhh       |
|                    | Ctnf      | Cntf      |                      | Egr2      | Egr2      |
|                    | Col18a1   | Col18a1   |                      | NSE       | Eno2      |
|                    | Col1a1    | Col1a1    |                      | ephA      | Epha1     |
|                    | Col1a2    | Col1a2    |                      | ephB      | Ephb1     |
|                    | Col3a1    | Col3a1    |                      | ErbB2     | ErbB2     |
|                    | Ctnnb1    | Ctnnb1    |                      | ErbB3     | ErbB3     |
|                    | Cx3cr1    | Cx3cr1    |                      | BFABP     | Fabp7     |
|                    | Cxcl12    | Cxcl12    |                      | FGF1      | Fgf1      |
|                    | Cxcl13    | Cxcl13    |                      | FGF2      | Fgf2      |
|                    | Cxcl14    | Cxcl14    |                      | Fn1       | Fn1       |
|                    | Cxcl16    | Cxcl16    |                      | GAP43     | Gap43     |
|                    | Cxcl5     | Cxcl5     |                      | Gapdh     | Gapdh     |
|                    | Cxcl9     | Cxcl9     |                      | Gdnf      | Gdnf      |
|                    | Cxcr4     | Cxcr4     |                      | Gfap      | Gfap      |
|                    | Dcstamp   | Dcstamp   |                      | Gfra1     | Gfra1     |
|                    | IL-35     | Ebi3      |                      | GMFB      | Gmfb      |
|                    | Fgfr1     | Fgfr1     |                      | Hgf       | Hgf       |
| Gapdh              | Gapdh     | Hprt      | Hprt                 |           |           |
| Gdnf               | Gdnf      | IGF-1     | Igf1                 |           |           |
| Hexb               | Hexb      | IGF-2     | Igf2                 |           |           |
| Hgf                | Hgf       | Il10      | Il10                 |           |           |
| Ifngr1             | Ifngr1    | IL1B      | Il1b                 |           |           |
| Igf1               | Igf1      | IL6       | Il6                  |           |           |
| Il10               | Il10      | Jam3      | Jam3                 |           |           |
| Il10rb             | Il10rb    | Jun       | Jun                  |           |           |

| CodeSet            | Gene Name   | HUGO Gene | CodeSet              | Gene Name | HUGO Gene |
|--------------------|-------------|-----------|----------------------|-----------|-----------|
| Macrophage CodeSet | Il12        | Il12b     | Schwann Cell CodeSet | Klf6      | Klf6      |
|                    | Il1a        | Il1a      |                      | L1CAM     | L1cam     |
|                    | Il1b        | Il1b      |                      | Lama2     | Lama2     |
|                    | Il4ra       | Il4ra     |                      | Lama5     | Lama5     |
|                    | Il6         | Il6       |                      | LGALS1    | Lgals1    |
|                    | Irf3        | Irf3      |                      | Lif       | Lif       |
|                    | Irf5        | Irf5      |                      | MAG       | Mag       |
|                    | Mac1 C3br C | Ilgam     |                      | MAL       | Mal       |
|                    | Ilgax       | Ilgax     |                      | Map1b     | Map1b     |
|                    | Jam3        | Jam3      |                      | Mapk3     | Mapk3     |
|                    | Jun         | Jun       |                      | MBP       | Mbp       |
|                    | Mac2        | Lgals3    |                      | Mmp17     | Mmp17     |
|                    | Lpar1       | Lpar1     |                      | MPZ       | Mpz       |
|                    | Ly6a        | Ly6a      |                      | NCAM1     | Ncam1     |
|                    | Ly6g        | Ly6g      |                      | Nes       | Nes       |
|                    | Ly6i        | Ly6i      |                      | Nf1       | Nf1       |
|                    | Mmp12       | Mmp12     |                      | Ngf       | Ngf       |
|                    | Mmp13       | Mmp13     |                      | p75 NTR   | Ngfr      |
|                    | Mmp27       | Mmp27     |                      | Nos2      | Nos2      |
|                    | Cd206       | Mrc1      |                      | NOTCH1    | Notch1    |
|                    | SRAI        | Msr1      |                      | Nrcam     | Nrcam     |
|                    | Myd88       | Myd88     |                      | Nrg1      | Nrg1      |
|                    | Nf1         | Nf1       |                      | Nrp-1     | Nrp1      |
|                    | Nfkbiz      | Nfkbiz    |                      | Ntf-5     | Ntf5      |
|                    | Ngfr        | Ngfr      |                      | Ntn-1     | Ntn1      |
|                    | Nos2        | Nos2      |                      | Pdgfa     | Pdgfa     |
|                    | Nrcam       | Nrcam     |                      | cd31      | Pecam1    |
|                    | Nrg1        | Nrg1      |                      | Pla2g6    | Pla2g6    |
|                    | Pak1        | Pak1      |                      | PLAT gene | Plat      |
|                    | Pdgfb       | Pdgfb     |                      | Plp1      | Plp1      |
|                    | Cd31        | Pecam1    |                      | Pmp22     | Pmp22     |
|                    | Cxcl4       | Pf4       |                      | Pou3f1    | Pou3f1    |
|                    | Ppbp        | Ppbp      |                      | Pten      | Pten      |
|                    | Pten        | Pten      |                      | Ptn       | Ptn       |
|                    | Retnla      | Retnla    |                      | RICTOR    | Rictor    |
|                    | Rictor      | Rictor    |                      | Robo1     | Robo1     |
|                    | S100a9      | S100a9    |                      | Robo2     | Robo2     |
|                    | Saa3        | Saa3      |                      | S100b     | S100b     |
|                    | SiglecE     | Siglece   |                      | Sema3a    | Sema3a    |
|                    | Socs1       | Socs1     |                      | Sema3b    | Sema3b    |
|                    | Socs3       | Socs3     |                      | slit2     | Slit2     |
|                    | Stat1       | Stat1     |                      | Sox-10    | Sox10     |
|                    | Stat2       | Stat2     |                      | sox2      | Sox2      |
|                    | Stat3       | Stat3     |                      | F-spondin | Spon1     |
|                    | Stat6       | Stat6     |                      | Spp1      | Spp1      |
| Tbp                | Tbp         | Tab2      | Tab2                 |           |           |
| Tgfb1              | Tgfb1       | Tbp       | Tbp                  |           |           |
| Thy1               | Thy1        | Thy1      | Thy1                 |           |           |
| Tlr2               | Tlr2        | Timp2     | Timp2                |           |           |
| Tlr4               | Tlr4        | Timp3     | Timp3                |           |           |
| Tlr8               | Tlr8        | Tnf       | Tnf                  |           |           |
| Tnfa               | Tnf         | unc5h2    | Unc5b                |           |           |
| Vegf               | Vegfa       | VEGFA     | Vegfa                |           |           |

**Table S2: Number of samples collected and submitted for SC<sub>exclusion</sub> experiment.**

Injured sciatic nerve was harvested from 3 mice 5 days after repair, and from 5 mice 14 days after repair. Cells were isolated by FACS into three populations, dump, macrophage, and Schwann cell (SC). Sorted cell samples were submitted for gene expression on the nanoString platform using two different gene codesets: macrophage and SC. Three samples were excluded from analysis on each codeset due to high content normalization factor (NF), indicating low RNA input.

|                    | SC codeset             |                                      |                       | Macrophage codeset     |                                      |                       |
|--------------------|------------------------|--------------------------------------|-----------------------|------------------------|--------------------------------------|-----------------------|
|                    | # of Samples Submitted | # of Samples Excluded Due to NF > 10 | # of Samples Analyzed | # of Samples Submitted | # of Samples Excluded Due to NF > 10 | # of Samples Analyzed |
| Day 5, Dump        | 3                      | 1                                    | 2                     | 3                      | 1                                    | 2                     |
| Day 5, Macrophage  | 3                      | 0                                    | 3                     | 3                      | 0                                    | 3                     |
| Day 5, SC          | 3                      | 1                                    | 2                     | 3                      | 2                                    | 1                     |
| Day 14, Dump       | 4                      | 0                                    | 4                     | 3                      | 0                                    | 3                     |
| Day 14, Macrophage | 5                      | 0                                    | 5                     | 3                      | 0                                    | 3                     |
| Day 14, SC         | 5                      | 1                                    | 4                     | 3                      | 0                                    | 3                     |

**Table S3: Number of samples collected and submitted for SC<sub>GFP</sub> experiment.**

Injured sciatic nerve was harvested from 8 mice (4 male, 4 female) 5 days after repair. Cells were isolated by FACS into three populations, dump, macrophage, and Schwann cell (SC). Sorted cell samples were submitted for gene expression on the nanoString platform using two different gene codesets: macrophage and SC. There was enough RNA input for all the samples; so, there was no sample exclusion for gene expression analysis.

|                   | SC codeset             |                                      |                       | Macrophage codeset     |                                      |                       |
|-------------------|------------------------|--------------------------------------|-----------------------|------------------------|--------------------------------------|-----------------------|
|                   | # of Samples Submitted | # of Samples Excluded Due to NF > 10 | # of Samples Analyzed | # of Samples Submitted | # of Samples Excluded Due to NF > 10 | # of Samples Analyzed |
| Day 5, Dump       | 8                      | 0                                    | 8                     | 8                      | 0                                    | 8                     |
| Day 5, Macrophage | 8                      | 0                                    | 8                     | 8                      | 0                                    | 8                     |
| Day 5, SC         | 8                      | 0                                    | 8                     | 8                      | 0                                    | 8                     |
